# Supplementary material for: [Pt(mesBIAN)(tda)]: A near-infrared emitter and singlet oxygen sensitizer
Source: Royal Society of Chemistry journal article supplement (doi:10.1039/b818177b), 2009-01-01
Supplement: b818177b.pdf [file b818177b.pdf]

Electronic Supporting Information for:

**[Pt(mesBIAN)(tda)]: A Near-Infrared Emitter and Singlet Oxygen Sensitizer**

Aaron A. Rachford,<sup>a</sup> Fei Hua,<sup>a</sup> Christopher J. Adams,<sup>b</sup> and Felix N. Castellano<sup>a\*</sup>

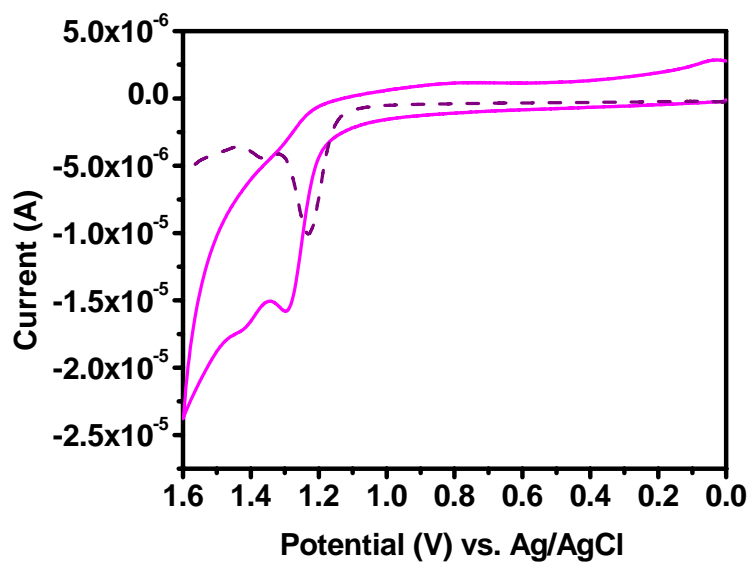

**Figure S1.** Cyclic and differential pulse voltammogram of [Pt(mesBIAN)(tda)] in 0.15 M TBAPF<sub>6</sub> in CH<sub>2</sub>Cl<sub>2</sub>, demonstrating irreversible oxidation in the complex.

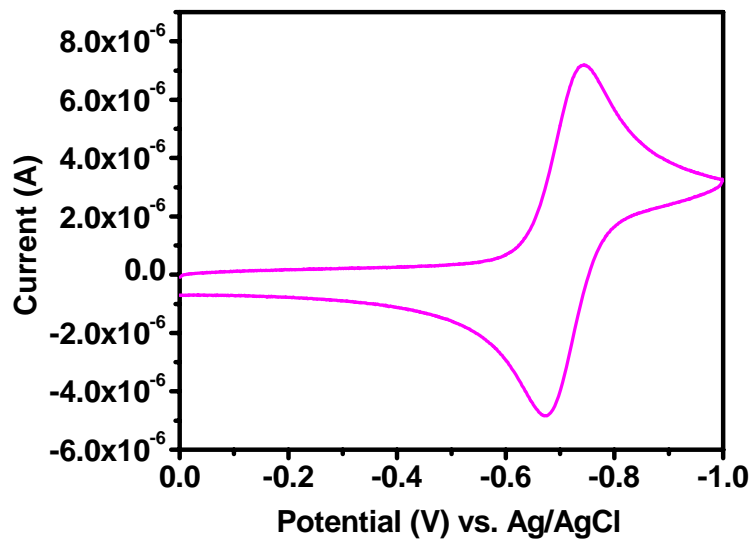

**Figure S2.** Cyclic voltammogram (0.15 M TBAPF<sub>6</sub> in CH<sub>2</sub>Cl<sub>2</sub>) showing the reversible one-electron reduction of the mesBIAN ligand in [Pt(mesBIAN)(tda)].

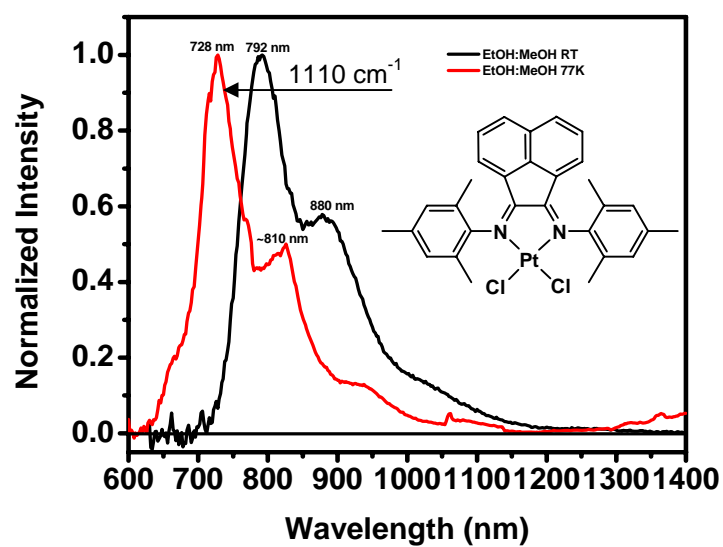

**Figure S3.** Temperature dependent emission spectra of [Pt(mesBIAN)Cl<sub>2</sub>] in 4:1 EtOH:MeOH at RT (black line) and 77 K (red line). A 1110 cm<sup>-1</sup> thermally-induced Stokes shift is observed.

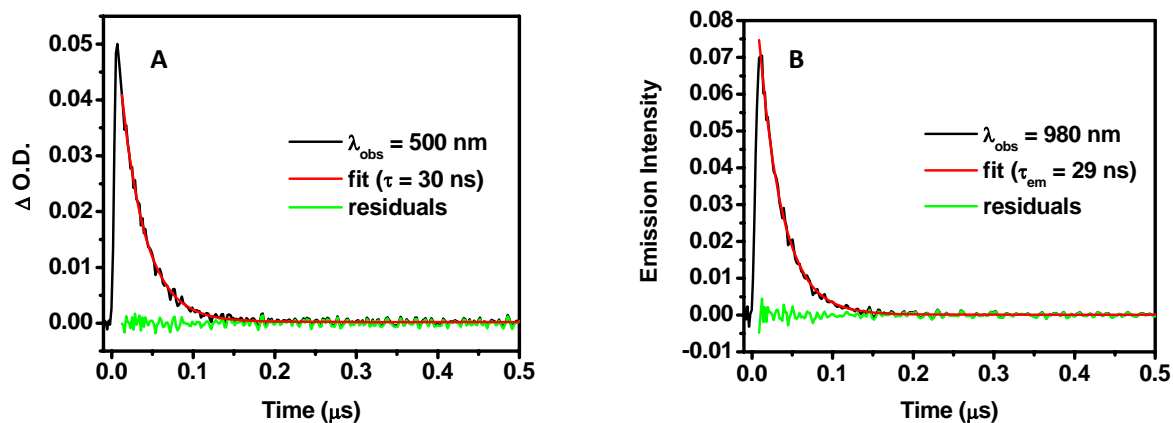

**Figure S4.** Representative transient absorption (A) and emission (B) decays of [Pt(mesBIAN)(tda)] in argon-saturated toluene with fitted lifetime and residuals superimposed.
